# Supplementary material for: Direct comparison of five serum biomarkers in early diagnosis of hepatocellular carcinoma
Source: PubMed Central journal article supplement — Cancer Manag Res. 2018 Jul 10;10:1947–58. doi: 10.2147/CMAR.S167036 (PMC6044429; doi:10.2147/cmar.s167036), 2018-07-10
Supplement: CMAR-10-1947-167036.pdf [file CMAR-10-1947-167036.pdf]

## Supplementary Material

### Direct comparison of five serum biomarkers in early detection of hepatocellular carcinoma

**Authors:** Hongda Chen<sup>1#</sup>, Yue Zhang<sup>1#</sup>, Siwen Li<sup>2#</sup>, Ni Li<sup>1</sup>, Yuhan Chen<sup>3</sup>, Bei Zhang<sup>2</sup>, Chunfeng Qu<sup>1</sup>, Huiguo Ding<sup>3</sup>, Jian Huang<sup>2, 4, \*</sup>, Min Dai<sup>1,\*</sup>

**Affiliations:**

<sup>1</sup> National Cancer Center/Cancer Hospital, Chinese Academy of Medical Sciences and Peking Union Medical College, Beijing 100021, China

<sup>2</sup> Liver Research Center, Experimental Center, Beijing Friendship Hospital, Capital Medical University, Beijing Key Laboratory of Translational Medicine in Liver Cirrhosis, Beijing, China

<sup>3</sup> Department of Gastrointestinal and Hepatology, Beijing You' An Hospital Affiliated to Capital Medical University, Beijing, China.

<sup>4</sup> National Clinical Research Center of Digestive Diseases, Beijing, China

# contributed equally to this work

**Address for correspondence:** Prof. Dr. Min Dai, National Cancer Center/Cancer Hospital, Chinese Academy of Medical Sciences and Peking Union Medical College, Beijing 100021, China; Email: [daimin2002@hotmail.com](mailto:daimin2002@hotmail.com); Tel: +86-10-8778-7394, and Prof. Dr. Jiang Huang, Liver Research Center, Beijing Friendship Hospital, Capital Medical University, Beijing 100050, China; Email: [huangj1966@hotmail.com](mailto:huangj1966@hotmail.com); Tel: +86-10-6313-9310

## Supplementary Material

### Supporting information:

**Table S1.** Clinicopathologic characteristics of patients with HCC, CHB or LC

**Table S2.** Association between the serum levels of six markers and clinicopathological factors in HCC patients

**Table S3.** Diagnostic performance of the combination of AFP with CENPF or SCCA for detecting HCC or early HCC

**Table S4.** Diagnostic performance of marker combinations for discriminating early-stage hepatocellular carcinoma and decompensated or compensated liver cirrhosis

**Table S5.** Diagnostic performance of AFP+DCP and their combination with age and sex for detecting hepatocellular carcinoma

**Table S6.** The regression equations and optimal probabilities of the combination of AFP and DCP

**Table S7.** The regression equations and optimal probabilities of the combination of AFP, DCP, age and sex

**Figure S1.** Scatter plot showing the expression intensity of AFP, AFP-L3, DCP, SCCA and CENPF-Ab between different study groups

**Figure S2.** Comparison of apparent and .632+ adjusted receiver operating characteristics (ROC) curves for AFP in discriminating: (a) HCC vs. CHB+LC+HC; (b) HCC vs. CHB+LC; (c) HCC vs CHB; (d) Early-stage HCC vs CHB+LC+HC; (e) Early-stage HCC vs CHB+LC; (f) Early-stage HCC vs LC

**Figure S3.** Comparison of apparent and .632+ adjusted receiver operating characteristics (ROC) curves for AFP-L3 in discriminating: (a) HCC vs. CHB+LC+HC; (b) HCC vs. CHB+LC; (c) HCC vs CHB; (d) Early-stage HCC vs CHB+LC+HC; (e) Early-stage HCC vs CHB+LC; (f) Early-stage HCC vs LC

**Figure S4.** Comparison of apparent and .632+ adjusted receiver operating characteristics (ROC) curves for DCP in discriminating: (a) HCC vs. CHB+LC+HC; (b) HCC vs. CHB+LC; (c) HCC vs CHB; (d) Early-stage HCC vs CHB+LC+HC; (e) Early-stage HCC vs CHB+LC; (f) Early-stage HCC vs LC

**Figure S5.** Comparison of apparent and .632+ adjusted receiver operating characteristics (ROC) curves for SCCA in discriminating: (a) HCC vs. CHB+LC+HC;

## Supplementary Material

(b) HCC vs. CHB+LC; (c) HCC vs CHB; (d) Early-stage HCC vs CHB+LC+HC; (e) Early-stage HCC vs CHB+LC; (f) Early-stage HCC vs LC

**Figure S6.** Comparison of apparent and .632+ adjusted receiver operating characteristics (ROC) curves for CENPF in discriminating: (a) HCC vs. CHB+LC+HC; (b) HCC vs. CHB+LC; (c) HCC vs CHB; (d) Early-stage HCC vs CHB+LC+HC; (e) Early-stage HCC vs CHB+LC; (f) Early-stage HCC vs LC

**Figure S7.** Comparison of .632+ adjusted receiver operating characteristics curves of two prediction algorithms (AFP+DCP and AFP+DPC+age+sex) for discriminating: (a) HCC vs. CHB+LC+HC; (b) HCC vs. CHB+LC; (c) HCC vs CHB; (d) Early-stage HCC vs CHB+LC+HC; (e) Early-stage HCC vs CHB+LC; (f) Early-stage HCC vs LC

**Abbreviations:** AUC=area under the curve. HCC=hepatocellular carcinoma; HC=healthy control; CHB=chronic hepatitis B virus infection; LC=liver cirrhosis

## Supplementary Material

Table S1. Clinicopathologic characteristics of patients with HCC, CHB or LC

| Variable              | HCC (N=202) | CHB (N=215) | LC (N=226) |
|-----------------------|-------------|-------------|------------|
| <b>AFP (n, %)</b>     |             |             |            |
| ≤20 ng/ml             | 103 (51.0)  | 172 (80.0)  | 199 (88.1) |
| >20 ng/ml             | 99 (19.0)   | 43 (20.0)   | 27 (11.9)  |
| <b>HBV-DNA (n, %)</b> |             |             |            |
| Negative              | 47 (23.3)   | 129 (60.0)  | 160 (70.8) |
| Positive              | 36 (17.8)   | 72 (33.5)   | 44 (19.5)  |
| Missing               | 119 (58.9)  | 14 (6.5)    | 22 (9.7)   |
| <b>HBsAg (n, %)</b>   |             |             |            |
| Negative              | 27 (13.3)   | 0 (0.0)     | 6 (2.7)    |
| Positive              | 132 (65.3)  | 184 (85.6)  | 184 (81.4) |
| Missing               | 43 (21.3)   | 31 (14.4)   | 36 (15.9)  |
| <b>HBeAg (n, %)</b>   |             |             |            |
| Negative              | 36 (17.8)   | 98 (45.6)   | 136 (60.9) |
| Positive              | 123 (60.9)  | 86 (40.0)   | 54 (17.8)  |
| Missing               | 43 (21.3)   | 31 (14.4)   | 36 (21.3)  |
| <b>HBsAb (n, %)</b>   |             |             |            |
| Negative              | 120 (59.4)  | 153 (71.2)  | 164 (72.6) |
| Positive              | 39 (19.3)   | 31 (14.4)   | 24 (10.6)  |
| Missing               | 43 (21.3)   | 31 (14.4)   | 36 (15.9)  |
| <b>HBeAb (n, %)</b>   |             |             |            |
| Negative              | 45 (22.3)   | 97 (45.1)   | 55 (24.3)  |
| Positive              | 114 (56.4)  | 87 (40.5)   | 135 (59.7) |
| Missing               | 43 (21.3)   | 31 (14.4)   | 36 (15.9)  |
| <b>HBcAb (n, %)</b>   |             |             |            |
| Negative              | 9 (4.5)     | 0 (0.0)     | 3 (1.3)    |
| Positive              | 149 (73.8)  | 184 (85.6)  | 187 (82.7) |
| Missing               | 44 (21.8)   | 31 (14.4)   | 36 (15.9)  |
| <b>HCV-DNA (n, %)</b> |             |             |            |
| Negative              | 133 (65.8)  | 31 (14.4)   | 100 (44.2) |
| Positive              | 14 (6.9)    | 0 (0)       | 2 (8.9)    |
| Missing               | 55 (27.2)   | 184 (85.6)  | 124 (54.9) |

**Abbreviations:** AFP, alpha-fetoprotein; CHB, chronic hepatitis B; HBV, hepatitis B virus; HBsAg, hepatitis B surface antigen; HBsAb, hepatitis B surface antibody; HBeAg, hepatitis B e antigen; HBeAb, hepatitis B e antibody; HBcAb, hepatitis B core antibody; HCC, hepatocellular carcinoma; LC, liver cirrhosis

## Supplementary Material

**Table S2. Association between the serum levels of six markers and clinicopathological factors in HCC patients**

| Variable               | AFP                                                  |                      | AFP-L3                                               |                      | DCP                                                  |                      | SCCA                                                 |                      | CENPF                                                |                      |
|------------------------|------------------------------------------------------|----------------------|------------------------------------------------------|----------------------|------------------------------------------------------|----------------------|------------------------------------------------------|----------------------|------------------------------------------------------|----------------------|
|                        | Median<br>(1 <sup>st</sup> Qu. -3 <sup>rd</sup> Qu.) | P-value <sup>¶</sup> | Median<br>(1 <sup>st</sup> Qu. -3 <sup>rd</sup> Qu.) | P-value <sup>¶</sup> | Median<br>(1 <sup>st</sup> Qu. -3 <sup>rd</sup> Qu.) | P-value <sup>¶</sup> | Median<br>(1 <sup>st</sup> Qu. -3 <sup>rd</sup> Qu.) | P-value <sup>¶</sup> | Median<br>(1 <sup>st</sup> Qu. -3 <sup>rd</sup> Qu.) | P-value <sup>¶</sup> |
| <b>Age (years)</b>     |                                                      |                      |                                                      |                      |                                                      |                      |                                                      |                      |                                                      |                      |
| ≤55                    | 35.6(6.7-330.7)                                      | 0.245                | 0.50(0.50-30.49)                                     | 0.904                | 222.0(52.3-2611.0)                                   | 0.329                | 113.9 (47.9-200.6)                                   | 0.133                | 169.9 (105.9-256.1)                                  | 0.662                |
| >55                    | 15.4(3.6-282.9)                                      |                      | 0.50(0.50-29.46)                                     |                      | 266.0(33.0-1432.0)                                   |                      | 133.5 (67.7-390.4)                                   |                      | 155.8 (82.3-267.1)                                   |                      |
| <b>Sex</b>             |                                                      |                      |                                                      |                      |                                                      |                      |                                                      |                      |                                                      |                      |
| Male                   | 15.1(4.4-238.7)                                      | 0.084                | 22.5(0.5-30.1)                                       | 0.439                | 248.5(39.0-1970.0)                                   | 0.851                | 119.7 (51.3-281.4)                                   | 0.484                | 167.2 (97.4-269.1)                                   | 0.594                |
| Female                 | 104.4(103-478.2)                                     |                      | 1.7(0.5-36.0)                                        |                      | 314.0(40.3-1322.0)                                   |                      | 138.1 (71.6-216.8)                                   |                      | 150.8 (109.6-205.8)                                  |                      |
| <b>HBsAg</b>           |                                                      |                      |                                                      |                      |                                                      |                      |                                                      |                      |                                                      |                      |
| Positive               | 4.1 (2.2-23.2)                                       | 0.063                | 0.5 (0.5-0.5)                                        | 0.420                | 28.0 (21.0-50.0)                                     | 0.4700               | 150.6 (77.6-312.6)                                   | 0.056                | 142.3 (69.8-209.4)                                   | 0.412                |
| Negative               | 7.8 (2.72-273.5)                                     |                      | 0.5 (0.5-0.5)                                        |                      | 35.0 (28.5-61.0)                                     |                      | 75.9 (58.3-175.5)                                    |                      | 143.8 (64.1-523.5)                                   |                      |
| <b>HBeAg</b>           |                                                      |                      |                                                      |                      |                                                      |                      |                                                      |                      |                                                      |                      |
| Positive               | 15.0(4.3-248.8)                                      | 0.218                | 0.50(0.50-21.8)                                      | 0.239                | 212.0(40.0-2122.0)                                   | 0.608                | 135.2(67.7-303.7)                                    | 0.186                | 150.8(78.0-226.6)                                    | 0.324                |
| Negative               | 67.6(8.4-545.0)                                      |                      | 3.2(0.50-59.9)                                       |                      | 391.0(55.0-2020.0)                                   |                      | 111.7(63.9-179.2)                                    |                      | 185.7(126.2-259.3)                                   |                      |
| <b>HCV infection</b>   |                                                      |                      |                                                      |                      |                                                      |                      |                                                      |                      |                                                      |                      |
| Positive               | 17.7(4.9-337.9)                                      | 0.912                | 0.50(0.50-22.0)                                      | 0.437                | 251.0(42.0-2083.0)                                   | 0.852                | 135.9(68.9-296.0)                                    | 0.069                | 162.8(97.7-238.7)                                    | 0.784                |
| Negative               | 20.4(5.7-167.7)                                      |                      | 1.6(0.50-42.2)                                       |                      | 337.0(36.5-1164.0)                                   |                      | 84.8(41.4-141.6)                                     |                      | 187.9(74.3-416.0)                                    |                      |
| <b>TNM tumor stage</b> |                                                      |                      |                                                      |                      |                                                      |                      |                                                      |                      |                                                      |                      |
| Stage I                | 13.2(3.3-184.5)                                      | <b>0.034</b>         | 0.5(0.5-0.8)                                         | <b>0.002</b>         | 71.5(30.0-518.0)                                     | <b>&lt;0.001</b>     | 135.9(67.6-289.0)                                    | <b>0.036</b>         | 138.9(70.9-192.1)                                    | <b>0.039</b>         |
| >Stage I               | 48.6(6.4-346.6)                                      |                      | 9.6(0.5-41.3)                                        |                      | 542.0(67.5-4126.0)                                   |                      | 71.8(47.7-86.9)                                      |                      | 192.3(100.1-320.0)                                   |                      |

<sup>¶</sup> The differences between the two groups were examined by the Wilcoxon Test.

## Supplementary Material

Table S3a. Diagnostic performance of the combination of AFP with CENPF or SCCA for detecting HCC

| Marker combination | HCC vs LC+HC     |                  | HCC vs LC        |                  | HCC vs HC        |                  |
|--------------------|------------------|------------------|------------------|------------------|------------------|------------------|
|                    | AUC¶             | SEN at 90% SPE§  | AUC¶             | SEN at 95% SPE§  | AUC¶             | SEN at 90% SPE§  |
| AFP+CENPF          | 0.77 (0.72-0.87) | 46.2 (28.6-64.6) | 0.68 (0.63-0.80) | 35.3 (20.9-55.0) | 0.90 (0.45-0.70) | 79.3 (67.3-90.9) |
| AFP+SCCA           | 0.63 (0.56-0.79) | 34.0 (20.0-56.8) | 0.60 (0.54-0.75) | 29.2 (17.9-52.6) | 0.82 (0.43-0.72) | 70.1 (57.9-85.7) |

Table S3b. Diagnostic performance of the combination of AFP with CENPF or SCCA for detecting Early-stage HCC

| Marker combination | Early-HCC vs LC+HC |                  | Early-HCC vs LC  |                  | Early-HCC vs HC  |                  |
|--------------------|--------------------|------------------|------------------|------------------|------------------|------------------|
|                    | AUC¶               | SEN at 90% SPE§  | AUC¶             | SEN at 95% SPE§  | AUC¶             | SEN at 90% SPE§  |
| AFP+CENPF          | 0.61 (0.52-0.79)   | 27.5 (9.1-53.0)  | 0.53 (0.41-0.71) | 20.6 (0-41.7)    | 0.84 (0.44-0.79) | 68.3 (44.4-91.7) |
| AFP+SCCA           | 0.62 (0.54-0.78)   | 31.7 (19.4-55.6) | 0.59 (0.53-0.74) | 30.0 (17.5-52.8) | 0.82 (0.44-0.72) | 71.1 (56.4-87.1) |

**Abbreviations:** AUC, area under the curve; CHB, chronic hepatitis B; HCC, hepatocellular carcinoma; LC, liver cirrhosis; SEN, sensitivity; SPE, specificity

¶ AUC was adjusted for potential overfitting by .632+ bootstrap method

§.632+ bootstrap adjusted sensitivity at cutoffs yielding 90% specificity

## Supplementary Material

Table S4. Diagnostic performance of marker combinations for discriminating early-stage hepatocellular carcinoma and liver cirrhosis

| Marker combination | Early-stage HCC vs decompensated LC |                    | Early-stage HCC vs compensated LC |                    | P-value* |
|--------------------|-------------------------------------|--------------------|-----------------------------------|--------------------|----------|
|                    | Apparent AUC [95% CI]               | .632+ AUC [95% CI] | Apparent AUC [95% CI]             | .632+ AUC [95% CI] |          |
| AFP+AFP-L3         | 0.63 [0.52-0.74]                    | 0.61 [0.39-0.75]   | 0.62 [0.50-0.74]                  | 0.61 [0.37-0.77]   | 0.904    |
| AFP+DCP            | 0.81 [0.75-0.86]                    | 0.73 [0.71-0.87]   | 0.84 [0.78-0.90]                  | 0.80 [0.53-0.88]   | 0.422    |
| AFP-L3+DCP         | 0.63 [0.52-0.74]                    | 0.61 [0.41-0.78]   | 0.81 [0.70-0.90]                  | 0.76 [0.36-0.80]   | 0.018    |
| AFP+AFP-L3+DCP     | 0.72 [0.61-0.82]                    | 0.68 [0.48-0.82]   | 0.82 [0.73-0.91]                  | 0.77 [0.33-0.80]   | 0.126    |

Abbreviations: AUC, area under the curve; HCC, hepatocellular carcinoma; LC, liver cirrhosis

\* p-value for examining the differences between the AUC of the marker combination for discriminating early-stage HCC vs. decompensated LC and the AUC for discriminating early-stage HCC vs. compensated LC, using bootstrapping method (1000 bootstrap samples)

## Supplementary Material

Table S5. Diagnostic performance of AFP+DCP and their combination with age and sex for detecting hepatocellular carcinoma

| Combination            | AFP+DCP          |                             | AFP+DCP+age+sex  |                             |
|------------------------|------------------|-----------------------------|------------------|-----------------------------|
|                        | AUC <sup>¶</sup> | SEN at 90% SPE <sup>§</sup> | AUC <sup>¶</sup> | SEN at 90% SPE <sup>§</sup> |
| HCC vs LC+CHB+HC       | 0.87[0.68-0.84]  | 73.8[63.6-84.2]             | 0.92[0.73-0.88]  | 77.3[66.6-86.3]             |
| HCC vs LC+CHB          | 0.84[0.67-0.83]  | 68.2[59.4-78.5]             | 0.91[0.74-0.88]  | 75.3[64.1-85.1]             |
| HCC vs LC              | 0.83[0.68-0.84]  | 64.2[53.9-76.6]             | 0.87[0.70-0.86]] | 64.2[53.9-76.6]             |
| Early HCC vs LC+CHB+HC | 0.79[0.73-0.88]  | 59.8[46.4-77.4]             | 0.88[0.80-0.93]  | 65.4[51.7-81.8]             |
| Early HCC vs LC+CHB    | 0.77[0.71-0.86]  | 56.0[43.2-70.6]             | 0.87[0.79-0.92]  | 63.2[48.4-78.4]             |
| Early HCC vs LC        | 0.75[0.71-0.87]  | 52.6[37.0-68.6]             | 0.81[0.71-0.89]  | 56.1[40.5-72.7]             |

**Abbreviations:** AUC, area under the curve; CHB, chronic hepatitis B; HCC, hepatocellular carcinoma; LC, liver cirrhosis; SEN, sensitivity; SPE, specificity

¶ AUC was adjusted for potential overfitting by .632+ bootstrap method

§ .632+ bootstrap adjusted sensitivity at cutoffs yielding 90% specificity



## Supplementary Material

**Table S6.** The regression equations and optimal probabilities of the combination of AFP and DCP

| Group                  | No.        | Regression model <sup>¶</sup><br>[ln(p/(1-p))] | Optimal probability <sup>§</sup> | Sensitivity (%) <sup>§</sup> | Specificity (%) <sup>§</sup> |
|------------------------|------------|------------------------------------------------|----------------------------------|------------------------------|------------------------------|
| HCC vs CHB+LC+HC       | 202 vs 644 | 0.004xAFP+0.004DCP-2.106                       | 0.129                            | 83.7                         | 85.1                         |
| HCC vs CHB+LC          | 202 vs 441 | 0.003xAFP+0.003DCP-1.698                       | 0.178                            | 83.2                         | 78.9                         |
| HCC vs LC              | 202 vs 226 | 0.003xAFP+0.002DCP-0.959                       | 0.301                            | 83.7                         | 77.4                         |
| Early-HCC vs CHB+LC+HC | 94 vs 644  | 0.004xAFP+0.002DCP-2.496                       | 0.084                            | 79.8                         | 81.2                         |
| Early-HCC vs CHB+LC    | 94 vs 441  | 0.003xAFP+0.002DCP-2.102                       | 0.119                            | 76.6                         | 76.6                         |
| Early-HCC vs LC        | 94 vs 226  | 0.003xAFP+0.001DCP-1.395                       | 0.210                            | 79.8                         | 75.2                         |

**Abbreviations:** CHB, chronic hepatitis B; HCC, hepatocellular carcinoma; LC, liver cirrhosis;

<sup>¶</sup> The algorithm was constructed using logistic regression model

<sup>§</sup> The optimal probability was defined by threshold showing the highest Youden's index (i.e., sensitivity + specificity-1)

<sup>§</sup> Apparent sensitivity/specificity without correction for potential overfitting at respective optimal probability (defined by the Youden's index)

## Supplementary Material

Table S7. The regression equations and optimal probabilities of the combination of AFP, DCP, age and sex.

| Group                  | No.        | Regression model <sup>¶</sup><br>[ln(p/(1-p))] | Optimal probability <sup>§</sup> | Sensitivity (%) <sup>§</sup> | Specificity (%) <sup>§</sup> |
|------------------------|------------|------------------------------------------------|----------------------------------|------------------------------|------------------------------|
| HCC vs CHB+LC+HC       | 201 vs 636 | 0.005xAFP+0.003xDCP+0.09xAGE-1.648xSEX-4.661   | 0.200                            | 86.6                         | 83.2                         |
| HCC vs CHB+LC          | 201 vs 433 | 0.004xAFP+0.002xDCP+0.102xAGE-1.646xSEX-4.909  | 0.319                            | 79.6                         | 88.5                         |
| HCC vs LC              | 201 vs 225 | 0.004xAFP+0.002xDCP+0.079xAGE-1.512xSEX-3.378  | 0.398                            | 79.6                         | 83.1                         |
| Early-HCC vs CHB+LC+HC | 94 vs 636  | 0.004xAFP+0.002xDCP+0.079xAGE-1.767xSEX-4.370  | 0.119                            | 85.1                         | 78.1                         |
| Early-HCC vs CHB+LC    | 94 vs 433  | 0.004xAFP+0.001xDCP+0.092xAGE-1.732xSEX-4.678  | 0.155                            | 86.2                         | 75.1                         |
| Early-HCC vs LC        | 94 vs 225  | 0.003xAFP+0.001xDCP+0.0068xAGE-1.587xSEX-3.164 | 0.296                            | 69.1                         | 84.9                         |

**Abbreviations:** CHB, chronic hepatitis B; HCC, hepatocellular carcinoma; LC, liver cirrhosis

<sup>¶</sup> The algorithm was constructed using logistic regression model, the age was continuous variable in years and the sex was categorical variable (male=1, female=2).

<sup>§</sup> The optimal probability was defined by threshold showing the highest Youden's index (i.e., sensitivity + specificity-1)

<sup>§</sup> Apparent sensitivity/specificity without correction for potential overfitting at respective optimal probability (defined by the Youden's index)

## Supplementary Material

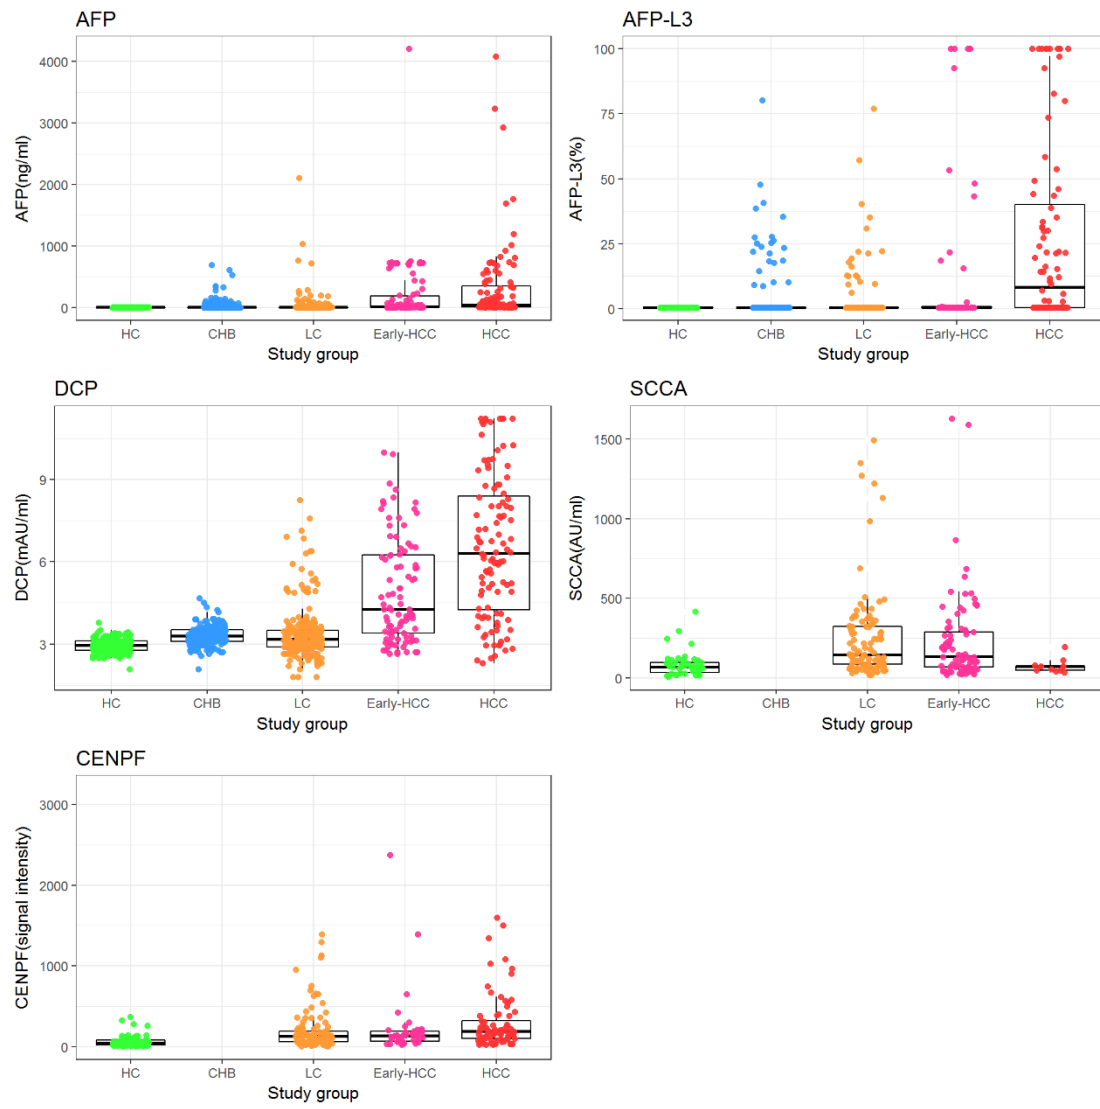

Figure S1. Scatter plot showing the expression intensity of AFP, AFP-L3, DCP, SCCA and CENPF-Ab between different study groups

Abbreviations: ROC=receiver operating characteristics. HCC=hepatocellular carcinoma; HC=healthy control; CHB=chronic hepatitis B virus infection; LC=liver cirrhosis

## Supplementary Material

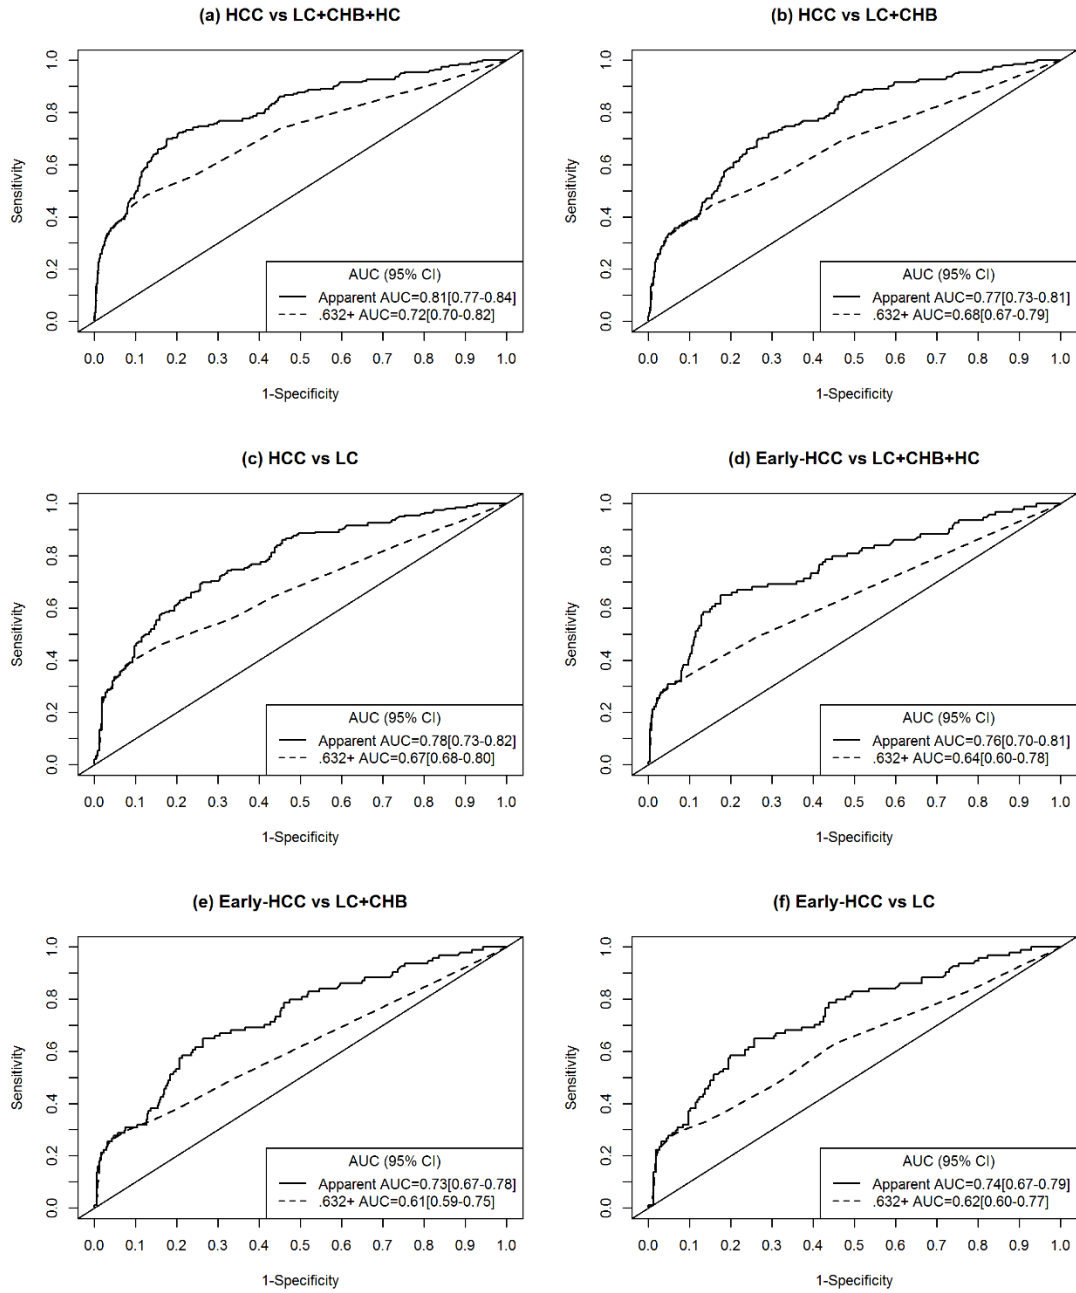

**Figure S2.** Comparison of apparent and .632+ adjusted receiver operating characteristics (ROC) curves for AFP in discriminating: (a) HCC vs. CHB+LC+HC; (b) HCC vs. CHB+LC; (c) HCC vs CHB; (d) Early-stage HCC vs CHB+LC+HC; (e) Early-stage HCC vs CHB+LC; (f) Early-stage HCC vs LC.

Abbreviations: AUC=area under the curve. HCC=hepatocellular carcinoma; HC=healthy control; CHB=chronic hepatitis B virus infection; LC=liver cirrhosis

## Supplementary Material

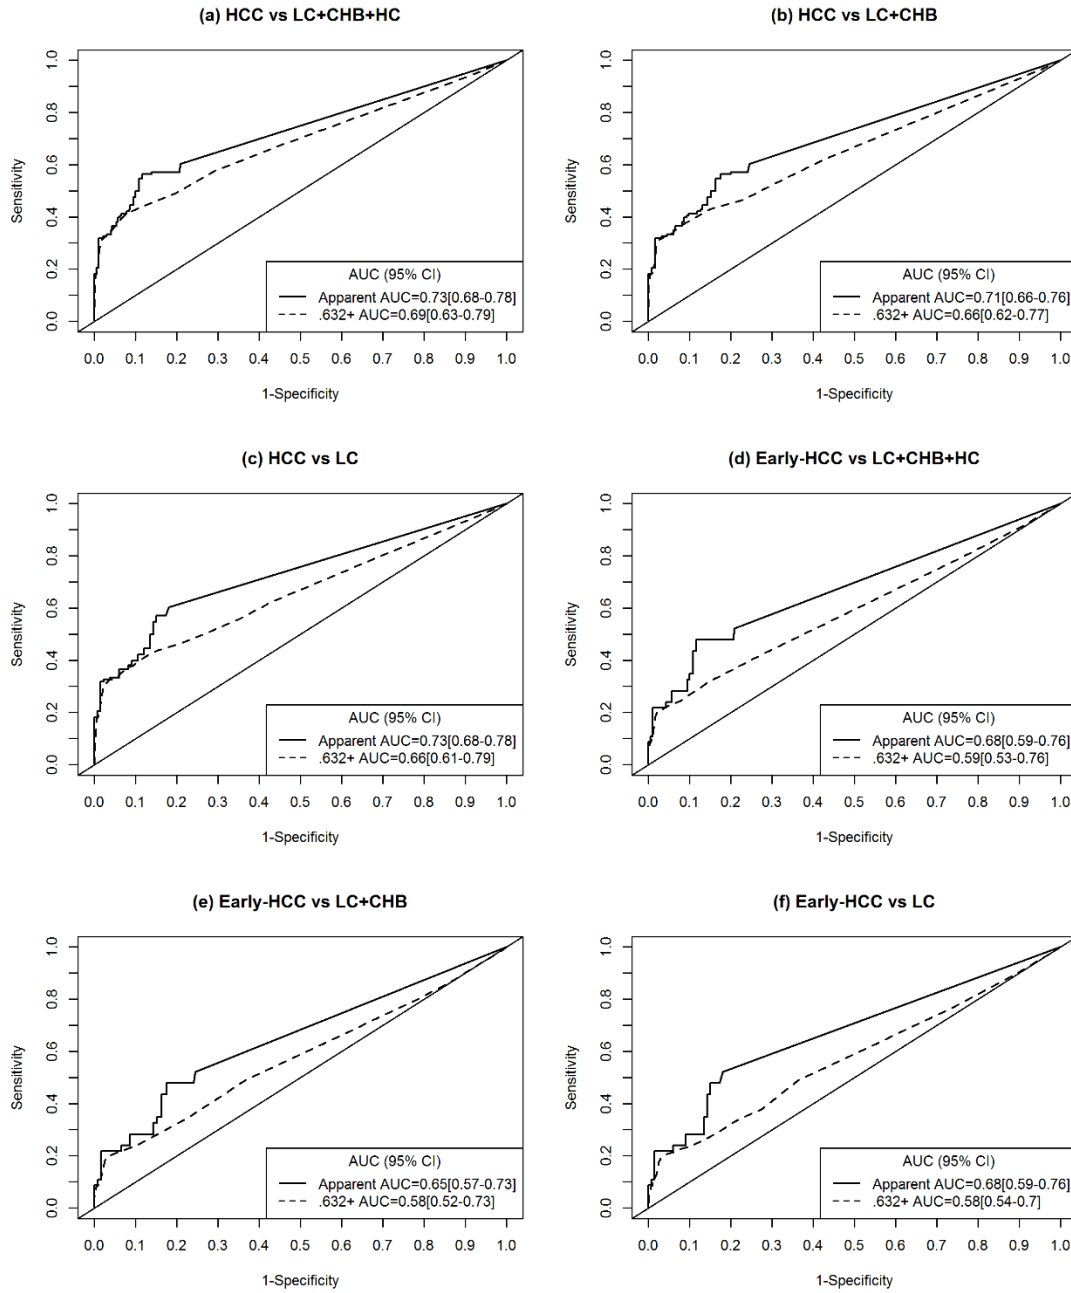

**Figure S3.** Comparison of apparent and .632+ adjusted receiver operating characteristics (ROC) curves for AFP-L3 in discriminating: (a) HCC vs. CHB+LC+HC; (b) HCC vs. CHB+LC; (c) HCC vs CHB; (d) Early-stage HCC vs CHB+LC+HC; (e) Early-stage HCC vs CHB+LC; (f) Early-stage HCC vs LC.

Abbreviations: AUC=area under the curve. HCC=hepatocellular carcinoma; HC=healthy control; CHB=chronic hepatitis B virus infection; LC=liver cirrhosis

## Supplementary Material

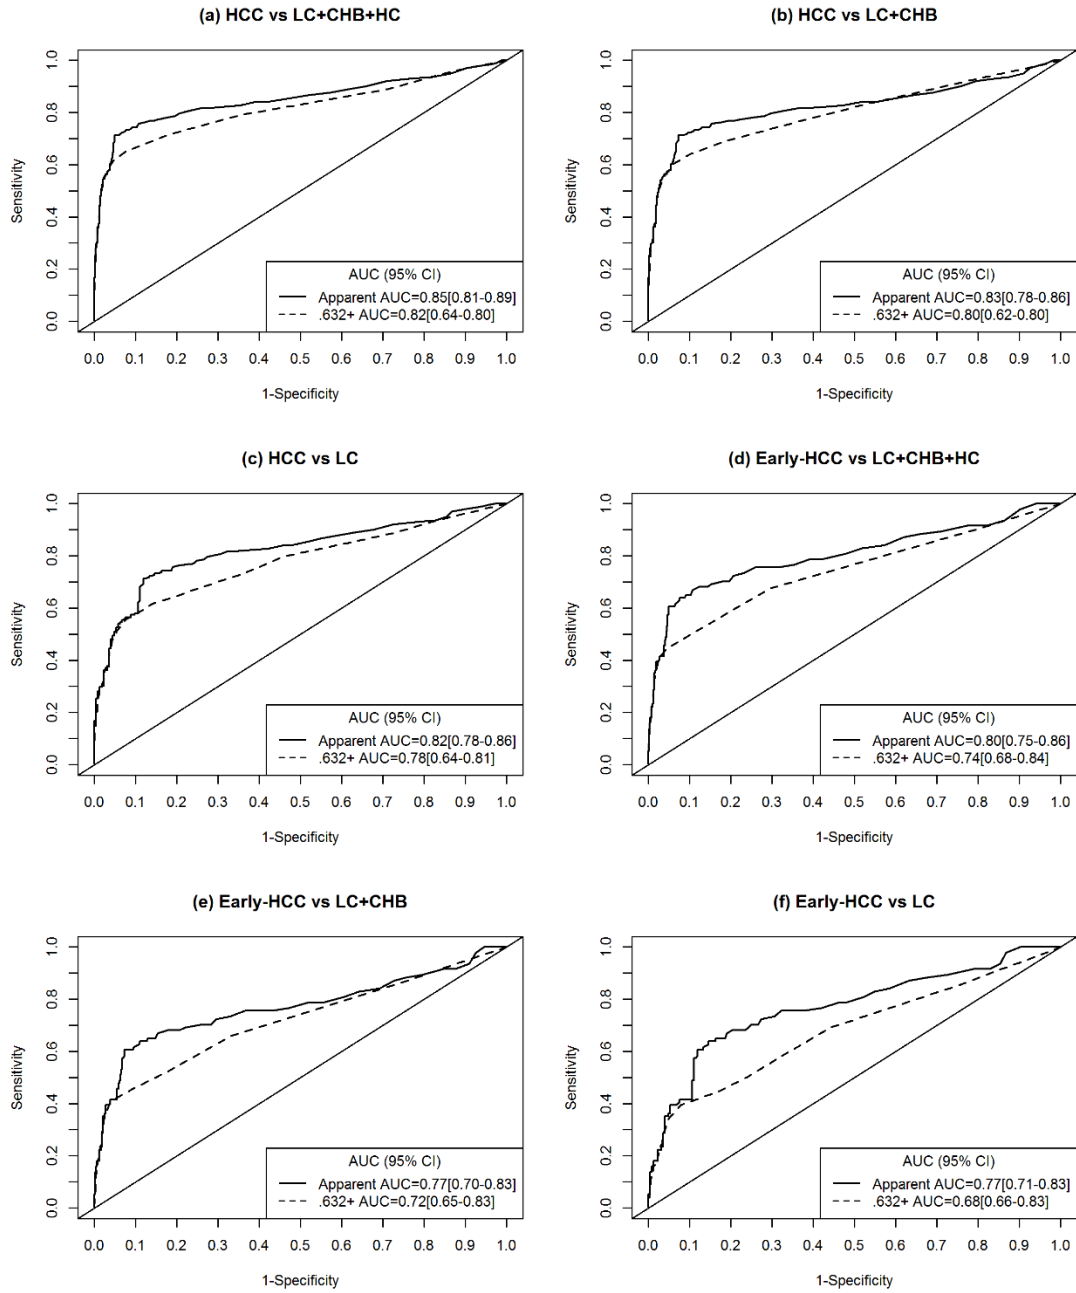

**Figure S4.** Comparison of apparent and .632+ adjusted receiver operating characteristics (ROC) curves for DCP in discriminating: (a) HCC vs. CHB+LC+HC; (b) HCC vs. CHB+LC; (c) HCC vs CHB; (d) Early-stage HCC vs CHB+LC+HC; (e) Early-stage HCC vs CHB+LC; (f) Early-stage HCC vs LC.

Abbreviations: AUC=area under the curve. HCC=hepatocellular carcinoma; HC=healthy control; CHB=chronic hepatitis B virus infection; LC=liver cirrhosis

## Supplementary Material

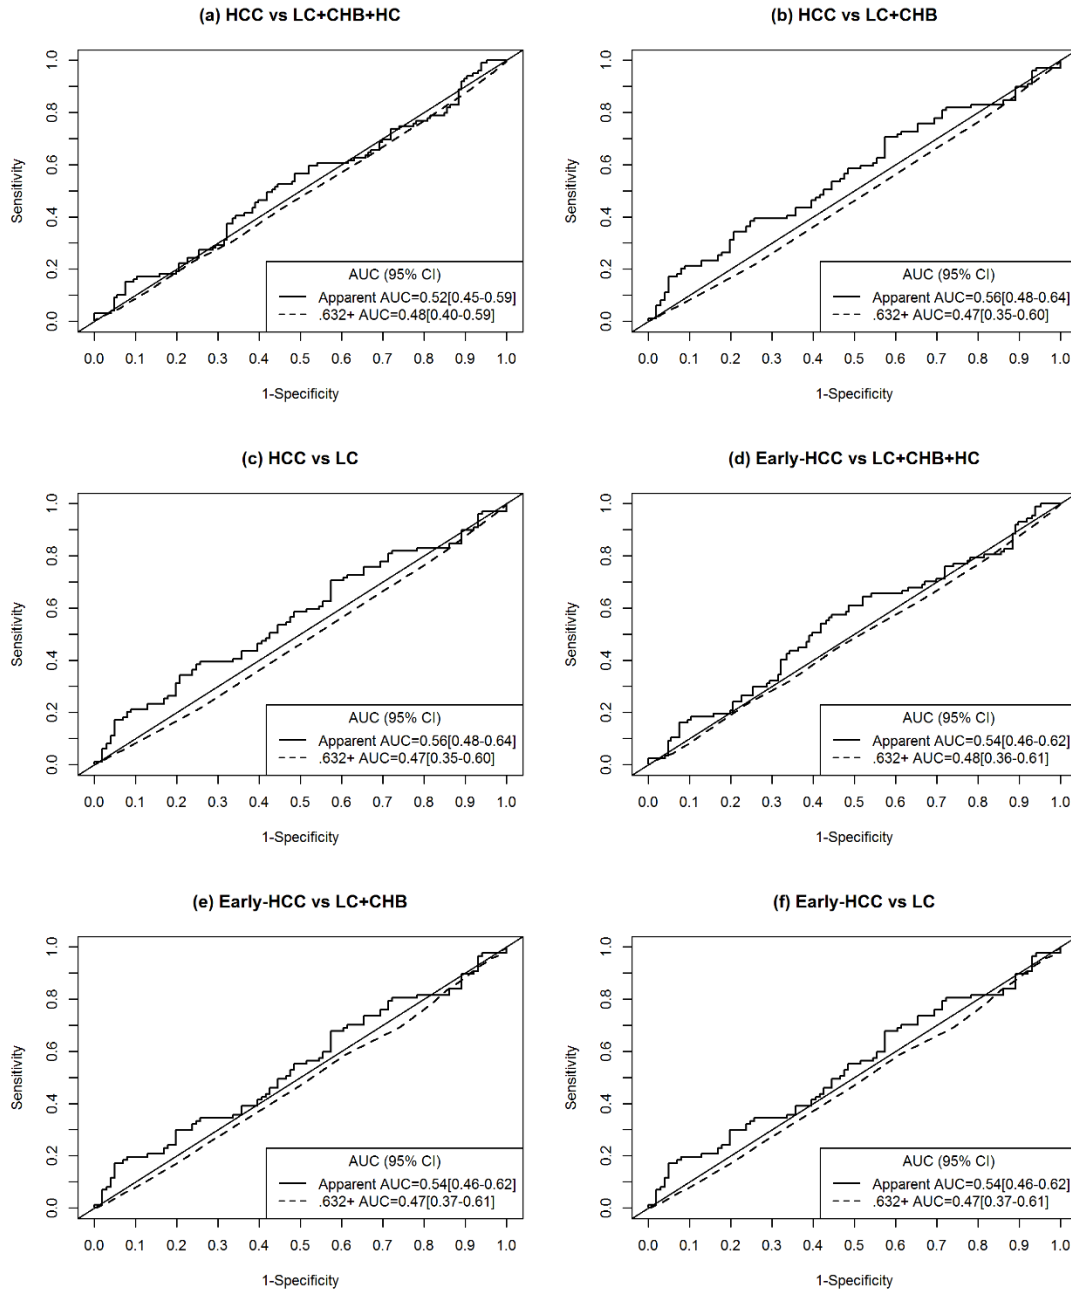

**Figure S5.** Comparison of apparent and .632+ adjusted receiver operating characteristics (ROC) curves for SCCA in discriminating: (a) HCC vs. CHB+LC+HC; (b) HCC vs. CHB+LC; (c) HCC vs CHB; (d) Early-stage HCC vs CHB+LC+HC; (e) Early-stage HCC vs CHB+LC; (f) Early-stage HCC vs LC.

Abbreviations: AUC=area under the curve. HCC=hepatocellular carcinoma; HC=healthy control; CHB=chronic hepatitis B virus infection; LC=liver cirrhosis

## Supplementary Material

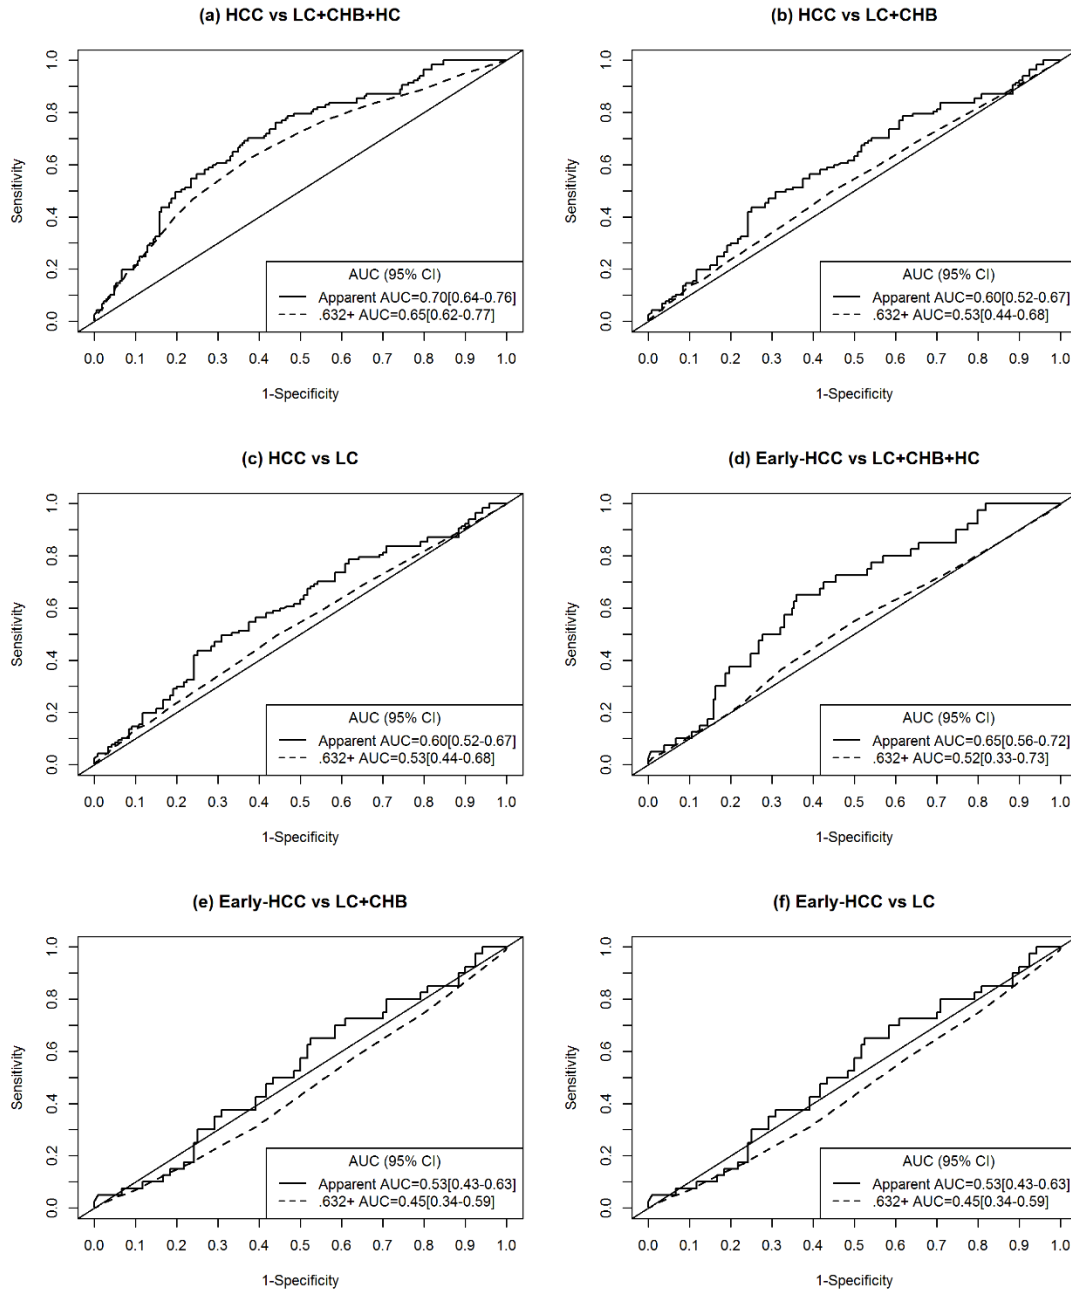

**Figure S6.** Comparison of apparent and .632+ adjusted receiver operating characteristics (ROC) curves for CENPF in discriminating: (a) HCC vs. CHB+LC+HC; (b) HCC vs. CHB+LC; (c) HCC vs CHB; (d) Early-stage HCC vs CHB+LC+HC; (e) Early-stage HCC vs CHB+LC; (f) Early-stage HCC vs LC.

Abbreviations: AUC=area under the curve. HCC=hepatocellular carcinoma; HC=healthy control; CHB=chronic hepatitis B virus infection; LC=liver cirrhosis



## Supplementary Material

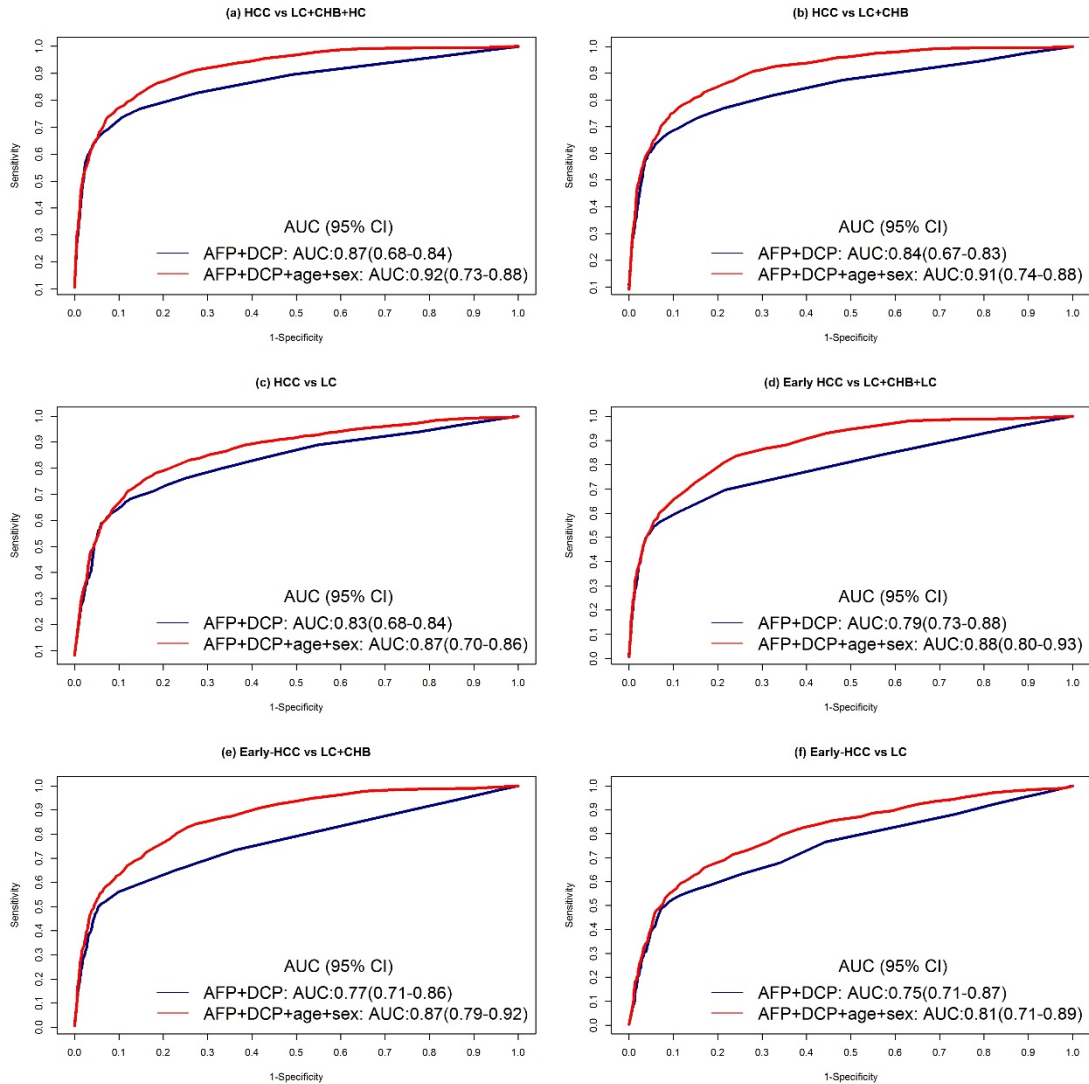

**Figure S7.** Comparison of .632+ adjusted receiver operating characteristics curves of two prediction algorithms (AFP+DCP and AFP+DPC+age+sex) for discriminating: (a) HCC vs. CHB+LC+HC; (b) HCC vs. CHB+LC; (c) HCC vs CHB; (d) Early-stage HCC vs CHB+LC+HC; (e) Early-stage HCC vs CHB+LC; (f) Early-stage HCC vs LC

Abbreviations: AUC=area under the curve. HCC=hepatocellular carcinoma; HC=healthy control; CHB=chronic hepatitis B virus infection; LC=liver cirrhosis
